# Supplementary material for: Biological Profile of Two Gentiana lutea L. Metabolites Using Computational Approaches and In Vitro Tests
Source: MDPI journal article supplement (doi:10.3390/biom11101490), 2021-10-09
Supplement: s1 [file s1]

## Supplementary

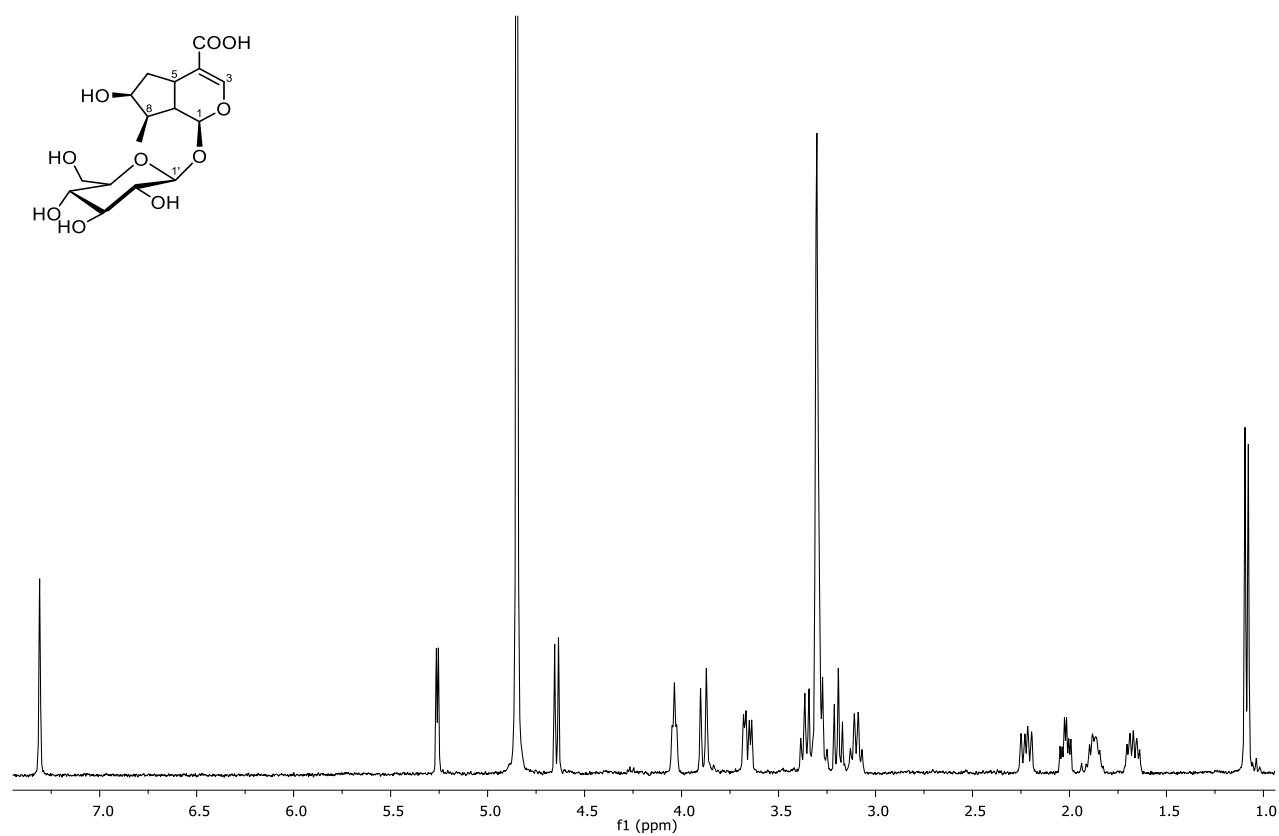

**Figure S1.**  $^1\text{H}$  NMR spectra of loganic acid (**1**) (400 MHz,  $\text{CD}_3\text{OD}$ ).

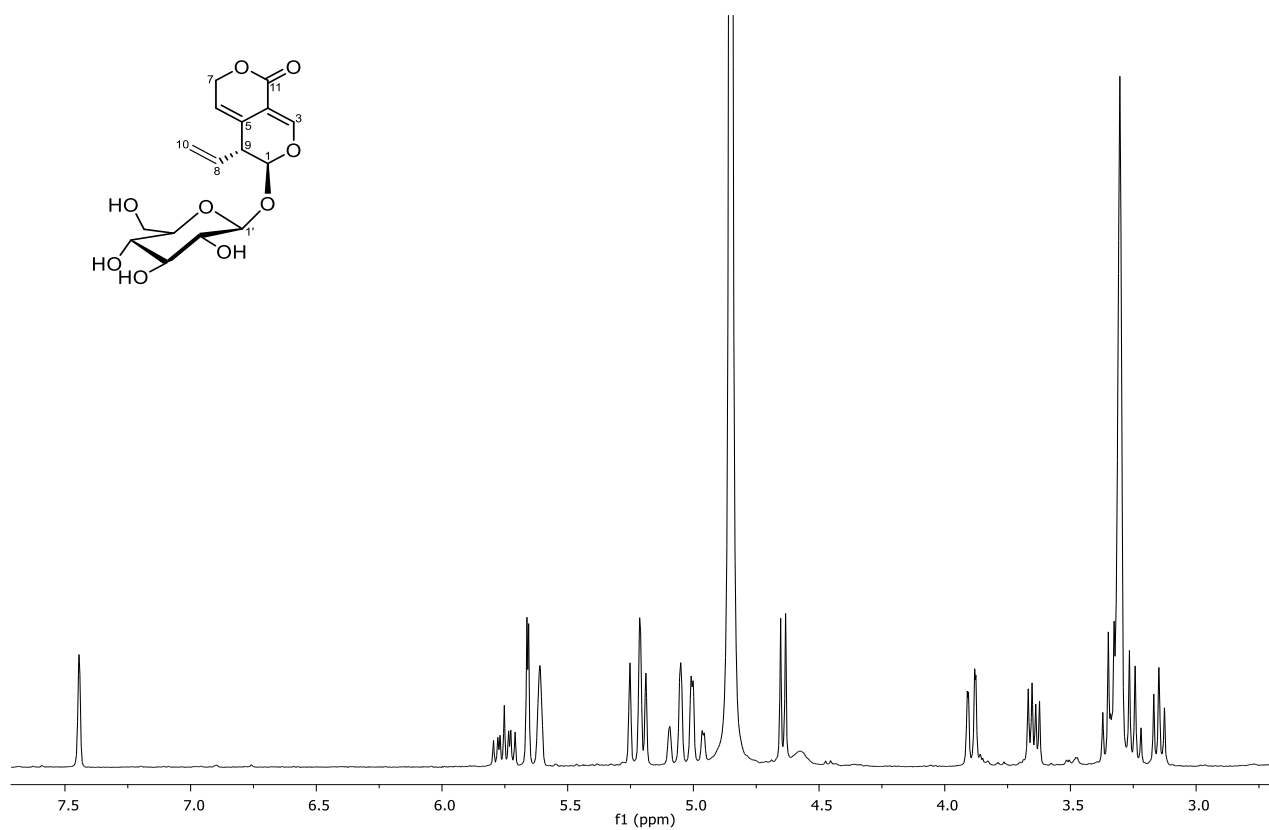

Figure S2.  $^1\text{H}$  NMR of gentiopicroside (**2**) (400 MHz,  $\text{CD}_3\text{OD}$ ).

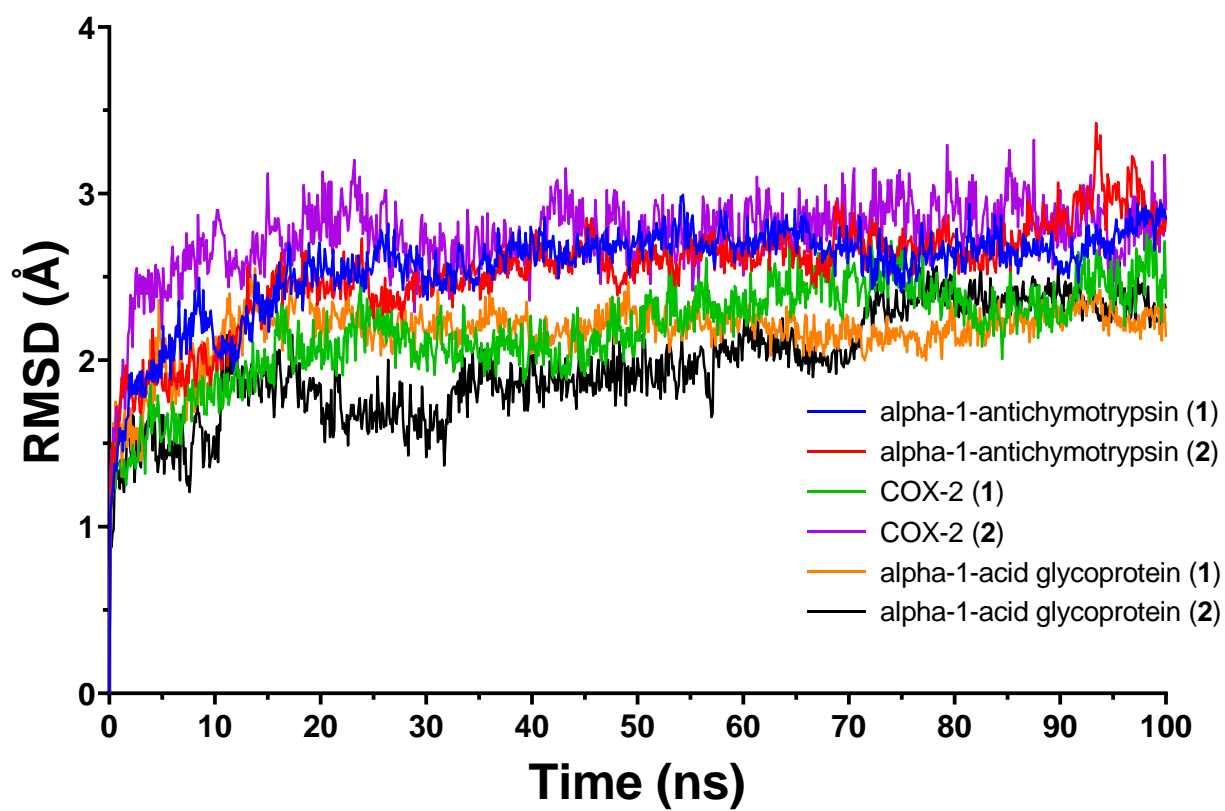

Figure S3. RMSD trend for the six complexes during the 100 ns MD simulation.
